# Supplementary material for: A Remarkable Impact of pH on the Thermo-Responsive Properties of Alginate-Based Composite Hydrogels Incorporating P2VP-PEO Micellar Nanoparticles
Source: MDPI journal article supplement (doi:10.3390/polym16070886), 2024-03-24
Supplement: s1 [file s1]

## Supporting Information

### A Remarkable Impact of pH on the Thermo-responsive Properties of Alginate-Based Composite Hydrogels Incorporating P2VP-PEO Micellar Nanoparticles

Amalia Iliopoulou<sup>1</sup>, Zacharoula Iatridi<sup>1</sup>, Constantinos Tsitsilianis<sup>1,\*</sup>

<sup>1</sup>Department of Chemical Engineering, University of Patras, 26500 Patras, Greece

**Table S1.** Molecular characteristics of the ALG-g-HG heterograft copolymer.

| ALG-g-HG heterograft copolymer                                                                 |         |
|------------------------------------------------------------------------------------------------|---------|
| Molecular weight, Mw (g/mol)                                                                   | 262,000 |
| Average number of P(NIPAM <sub>86</sub> -co-NtBAM <sub>14</sub> ) chains per Alginate backbone | 3.5     |
| Average number of PNIPAM chains per Alginate backbone                                          | 1.8     |

**Table S2.** Molecular characteristics of the P2VP-*b*-PEO copolymer.

|                     | Composition*  | Molecular weight** |            |
|---------------------|---------------|--------------------|------------|
|                     | (P2VP %moles) | Mn (g/mol)         | Mw (g/mol) |
| P2VP block          | 100***        | 2583               | 2678       |
| P2VP- <i>b</i> -PEO | 9             | 13144              | 14384      |

\*by <sup>1</sup>H-NMR; \*\* by Size Exclusion Chromatography; \*\*\* The P2VP block polymer is basically the precursor block on which the ethylene oxide (EO) comonomer is subsequently polymerized to produce the P2VP-*b*-PEO final copolymer

**Table S3.** Characteristic factors of thermoresponsiveness at various pH for the pure ALG-g-HG copolymer.

| 4% Alg-g-(NIPAM <sub>86</sub> NtBAM <sub>14</sub> )-g-PNIPAM |                                              |                          |                        |                                                                 |                                                      |
|--------------------------------------------------------------|----------------------------------------------|--------------------------|------------------------|-----------------------------------------------------------------|------------------------------------------------------|
| PH                                                           | T <sub>c</sub> ,<br>thermothickening<br>(°C) | T <sub>gel</sub><br>(°C) | T <sub>f</sub><br>(°C) | ΔT=T <sub>f</sub> -T <sub>c</sub> ,<br>thermothickening<br>(°C) | G'(T=50)/G'(T= T <sub>c</sub> ,<br>thermothickening) |
| 7.40*                                                        | 29.5                                         | 31.5                     | 36.6                   | 7.0                                                             | 142/0.4=340                                          |
| 5.80                                                         | 32.6                                         | 34.4                     | 41.7                   | 9.1                                                             | 66.4/1.1=60.4                                        |
| 4.50                                                         | 24.3                                         | 29.2                     | 42.7                   | 18.4                                                            | 73.0/2.8=26.1                                        |
| 3.50                                                         | 21.2                                         | --                       | 37.7                   | 16.5                                                            | 689.4/213.6=3.2                                      |

\*At pH 7.4 the polymer concentration was 5 wt%.

**Table S4.** The hydrodynamic diameters of P2VP-*b*-PEO polymeric micelles obtained from the number- and volume- weighted distributions of the DLS analyses. Values are reported as the mean value of the peak size.

| Particle Size Distributions |                 |                 |
|-----------------------------|-----------------|-----------------|
| Diameter, nm                |                 |                 |
| pH                          | Number-weighted | Volume-weighted |
| 7.4                         | 20.03           | 22.38           |
| 5.4                         | 28.92           | 33.73           |
| 3.5                         | 3.21            | 3.50            |

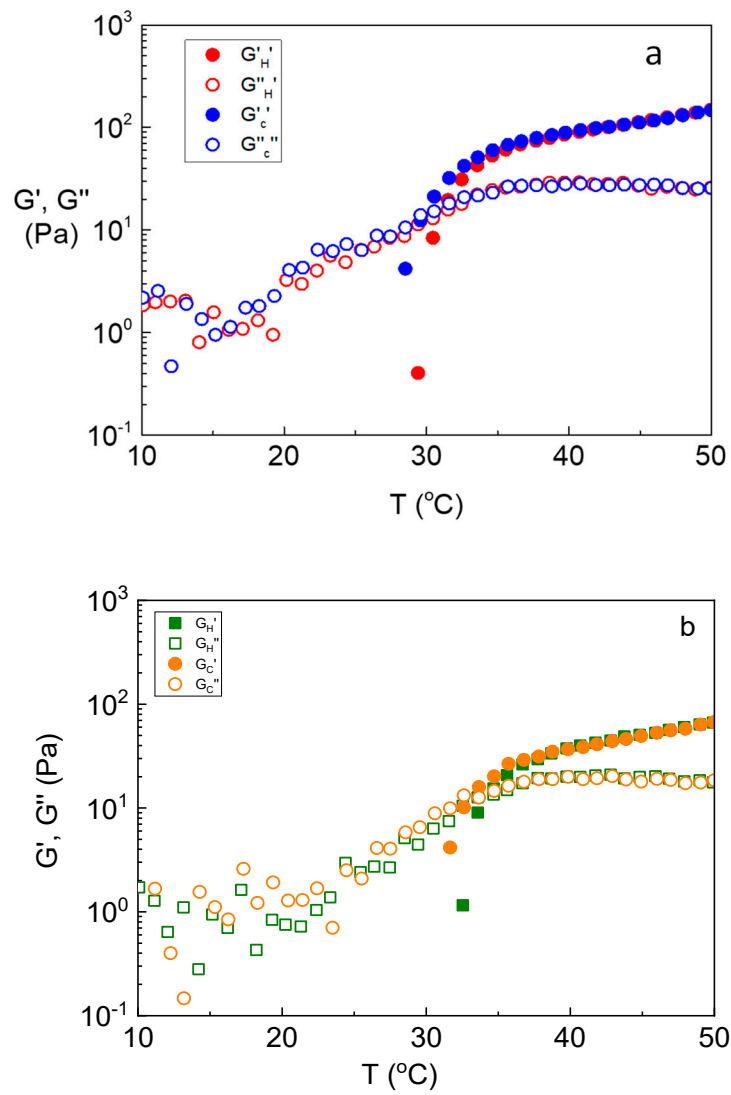

**Figure S1.** Storage ( $G'$ ) and loss ( $G''$ ) modulus as a function of temperature of ALG-g-HG solutions (a) 5 wt% and (b) 4 wt%.

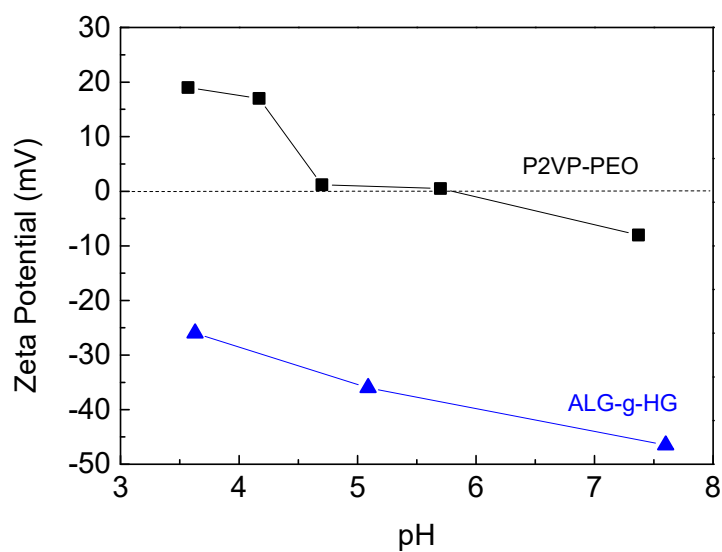

**Figure S2.** Zeta potential of aqueous P2VP-*b*-PEO (■) and ALG-g-HG (▲) solutions at different pH.

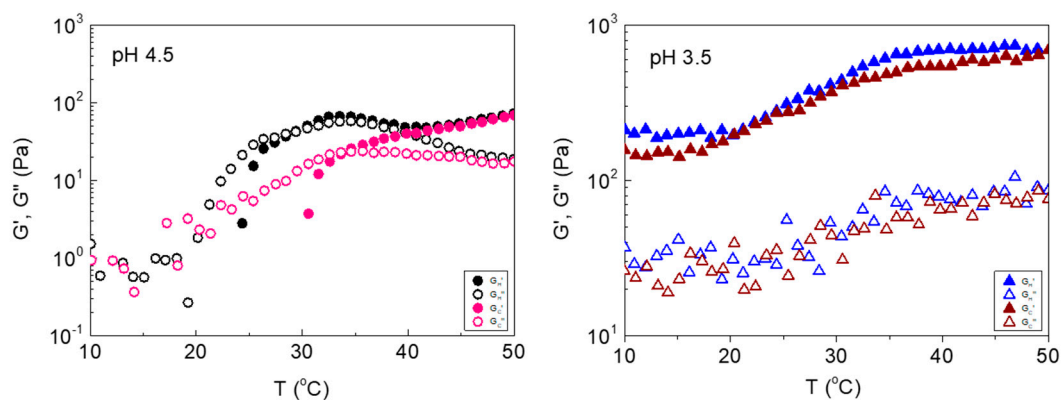

**Figure S3.** Storage ( $G'$ ) and loss ( $G''$ ) modulus as a function of temperature of 4 wt% ALG-g-HG hydrogels at (a) pH 4.5 and (b) pH 3.5.

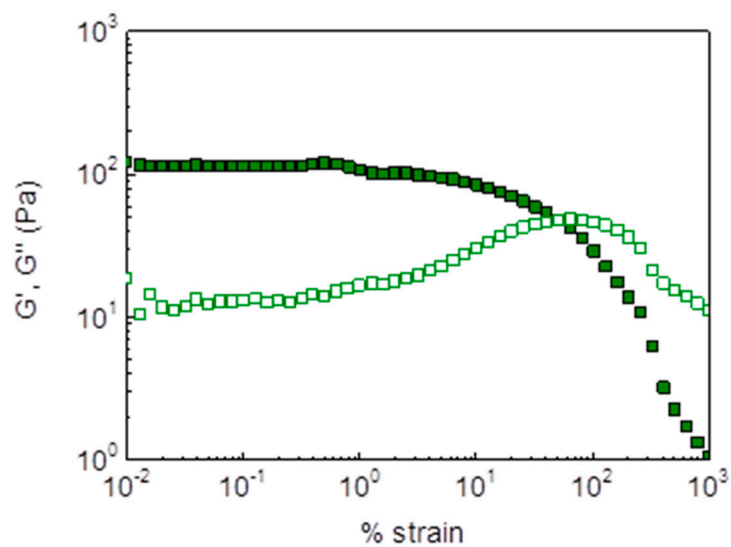

**Figure S4.** Oscillatory strain sweep data at 1 Hz of the 4 wt% ALG-g-HG hydrogel at pH 4 and 37 °C.

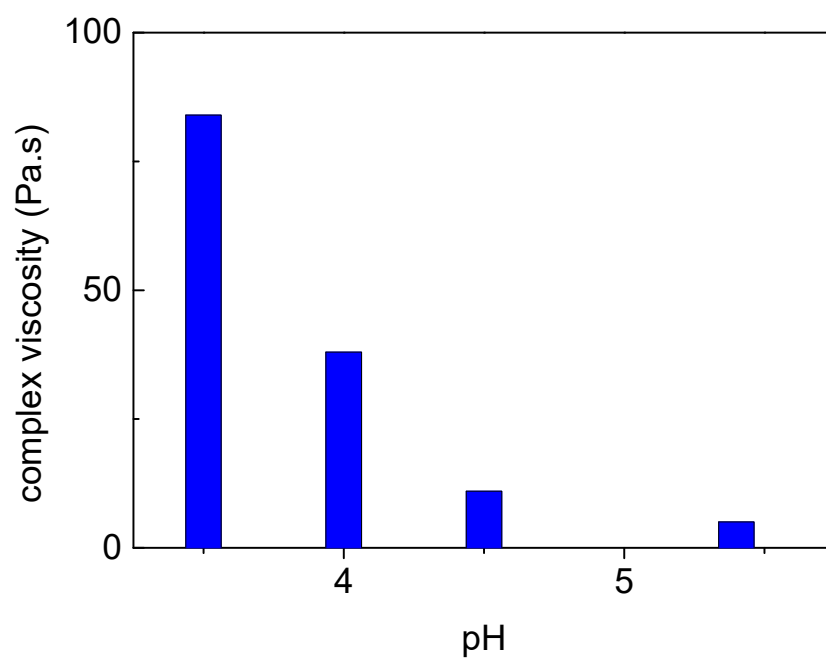

**Figure S5.** pH dependence of complex viscosity (1Hz) at 37 °C. The data were extracted from the experiments of Figure 2 (heating ramp).

## *Injectability*

As reported the limit of the injection force  $F$  for a comfortable injection is 12 N [1].  $F$  is given by the equation 1, where  $\eta$  is the shear viscosity and  $Q_v$  the flow rate of a liquid injected through a syringe of radius  $R_s$ , needle of radius  $R_n$ , and length  $L$ , with  $F_f$  the friction force of the piston in the syringe [2].

$$F = \frac{8\eta L Q_v R_s^2}{R_n^4} + F_f \quad (1)$$

For a 25G syringe:  $R_s=2.4$  mm,  $R_n=0.13$  mm,  $L=12.7$  mm. Considering that the friction force is negligible ( $F_f=0$ ) and applying  $Q_v=1$  mL/min, equation 1 can be written as  $F=K\eta$  where  $K=34.5 \text{ m}^2 \text{ s}^{-1}$

For a comfortable injection,  $F$  should be lower than 12 N [1]. Therefore, the shear viscosity should be lower than  $\eta=F/K=12 \text{ N}/34.5 \text{ m}^2 \text{ s}^{-1}=0.35 \text{ Pa.s}$ .

Moreover, the shear rate  $\dot{\gamma}$  applied during injection can be calculated by the equation (2).

$$\dot{\gamma} = \frac{4Q_v}{\pi R_n^3} \quad (2)$$

For a 25G syringe ( $R_n=0.13$  mm) and  $Q_v=1$  mL/min  $\dot{\gamma}=9.65 \times 10^3 \text{ s}^{-1}$ .

## **References**

- [1] T. E. Robinson, E. A. B. Hughes, A. Bose, E. A. Cornish, J. Y. Teo, N. M. Eisenstein, L. M. Grover, S. C. Cox Filling the Gap: A Correlation between Objective and Subjective Measures of Injectability. *Adv. Healthcare Mater.* **2020**, 9, 1901521 DOI: 10.1002/adhm.201901521
- [2] A. Allmendinger, S. Fischer, J. Huwyler, H.-C. Mahler, E. Schwarb, I. E. Zarraga, R. Mueller, Rheological characterization and injection forces of concentrated protein formulations: An alternative predictive model for non-Newtonian solutions. *European Journal of Pharmaceutics and Biopharmaceutics* **2014**, 87, 318–328, doi.org/10.1016/j.ejpb.2014.01.009
